# Supplementary material
Source: PubMed Central journal article supplement (PMC5903212)
Supplement: mic-162-1857-s001.pdf [file mic-162-1857-s001.pdf]

# Supplemental Figures

Xue et al.

- Fig. S1. Model of SigO-RsoA transcription complex.
- Fig. S2. Alternative BACTH assay of RsoA N- and C-terminal deletions.
- Fig. S3. Total and soluble expression of T25-RsoA region 2.3 alanine substitution mutants in CyaA<sup>+</sup> *E. coli* background.
- Fig. S4. Activity of key RsoA mutants interacting with  $\beta'$  subunit N-terminus (amino acids 1-303).
- Fig. S5. Interaction of epitope-tagged RsoA derivatives with SigO-FLAG.
- Fig. S6. Accumulation of CyaA-RsoA-HA fusion proteins in *E. coli*.
- Fig. S7. Mutation of RsoA F67 results in aberrant mobility of CyaA-RsoA<sup>2.3</sup>-HA during SDS-PAGE.
- Fig. S8. Multiple sequence alignment of *B. subtilis* RsoA with 44 RsoA orthologs.
- Table S1. Bacterial strains used in this study.
- Table S2. Plasmids used in this study.

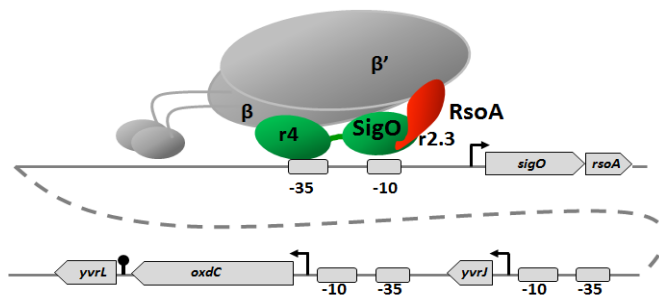

**Fig. S1.** Model of SigO-RsoA transcription complex. RsoA is situated proximal to promoter -10 element based on region 2.3 interaction with amino terminus of SigO (this work) and the  $\beta'$  clamp helices (MacLellan *et al.*, 2009). The SigO-RsoA complex autoregulates its own expression and the expression of *yvrJ* and the *oxdC-yvrL* operon. An intergenic stem-loop structure attenuates expression of YvrL relative to OxdC (MacLellan *et al.*, 2008).

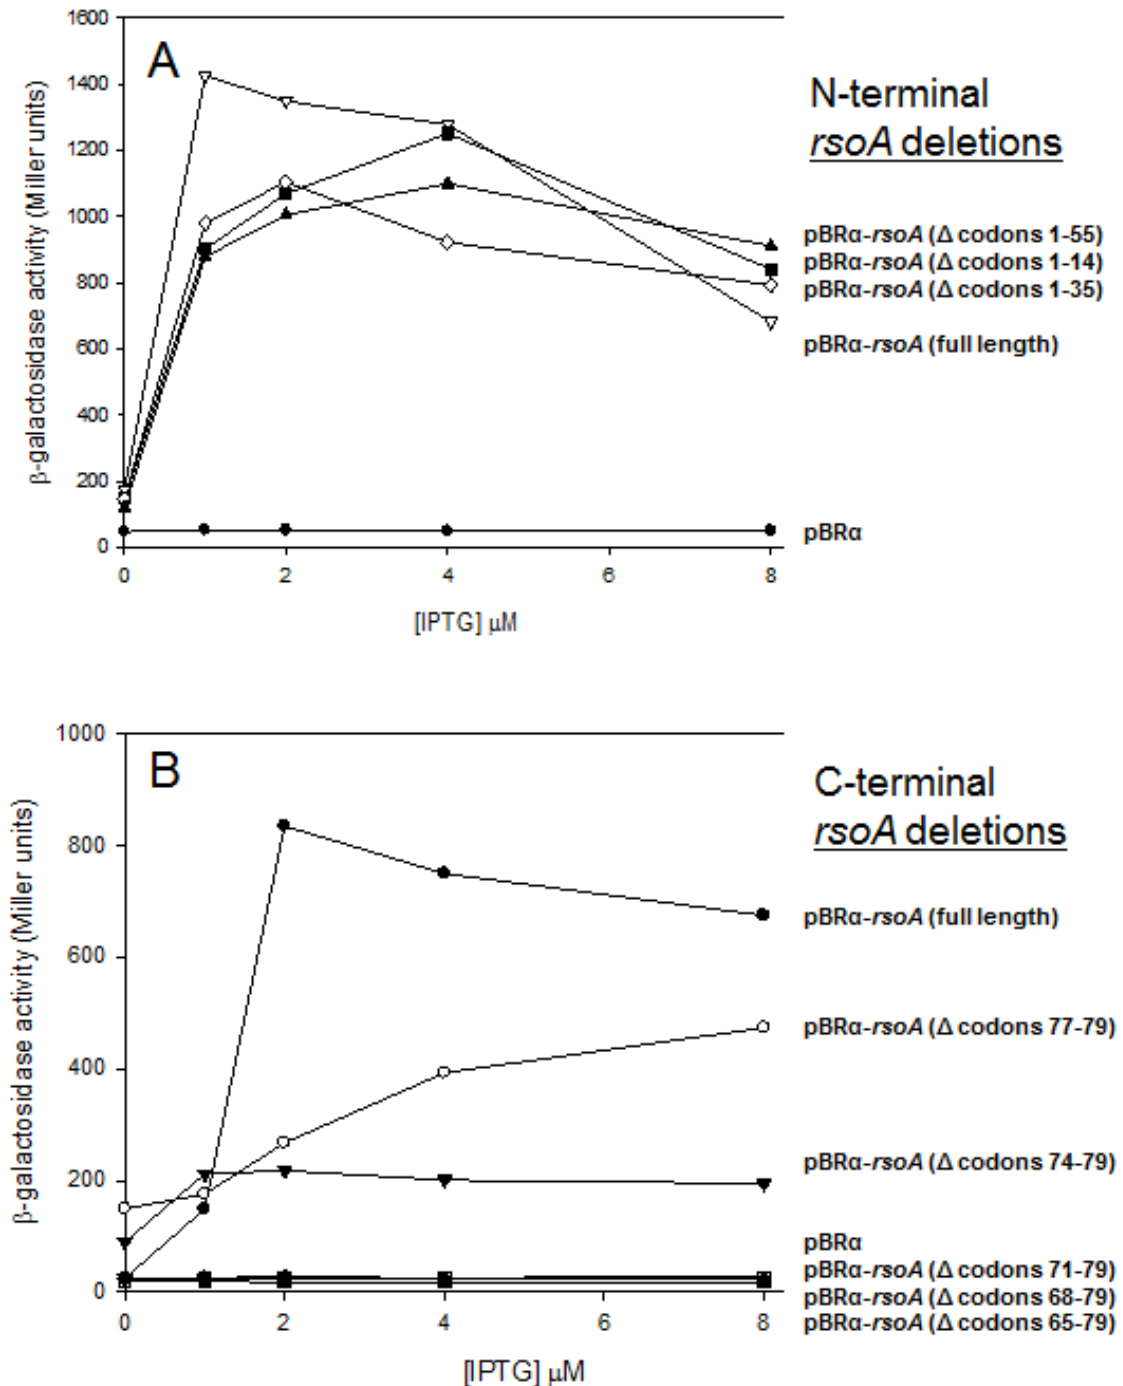

**Fig. S2.** Alternative BACTH assay of A) 14, 35, and 55 amino acid RsoA N-terminal deletion derivatives and B) 3, 6, 9, 12, and 15 amino acid RsoA C-terminal deletion derivatives using  $\lambda$ cl-SigO fusions and RpoA ( $\alpha$  subunit)-RsoA fusions in host strain *E. coli* FW Kan O<sub>L</sub>2-62 lac. Details of assay methodology are as described in Dove and Hochschild (2004) and MacLellan et al., (2009).

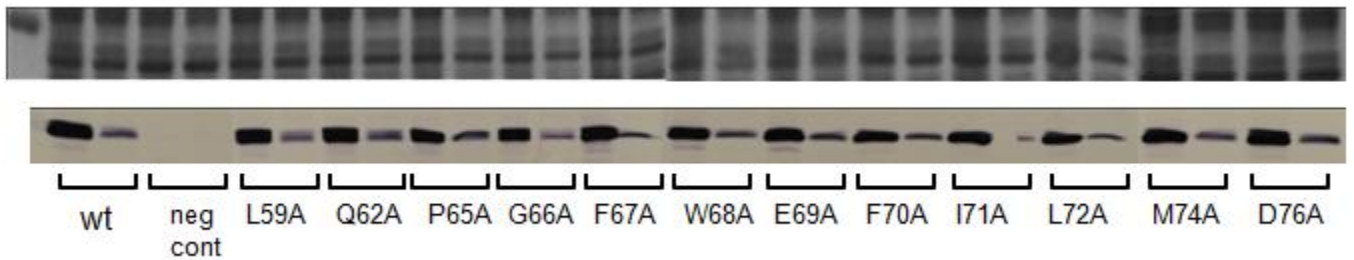

**Fig.S3.** wt and region 2.3 alanine mutant RsoA accumulation and solubility in CyaA+ strain for strains used in Fig.4. After cell lysis, crude (uncentrifuged) and clarified (centrifuged) lysate was run (lanes 1 and 2 for each isolate, respectively) to examine accumulation of total and soluble RsoA in cells via Western immunoblotting (lower panel). Coomassie stained proteins (upper panel) act as loading control. This image is a composite picture produced from several gels run during same experiment.

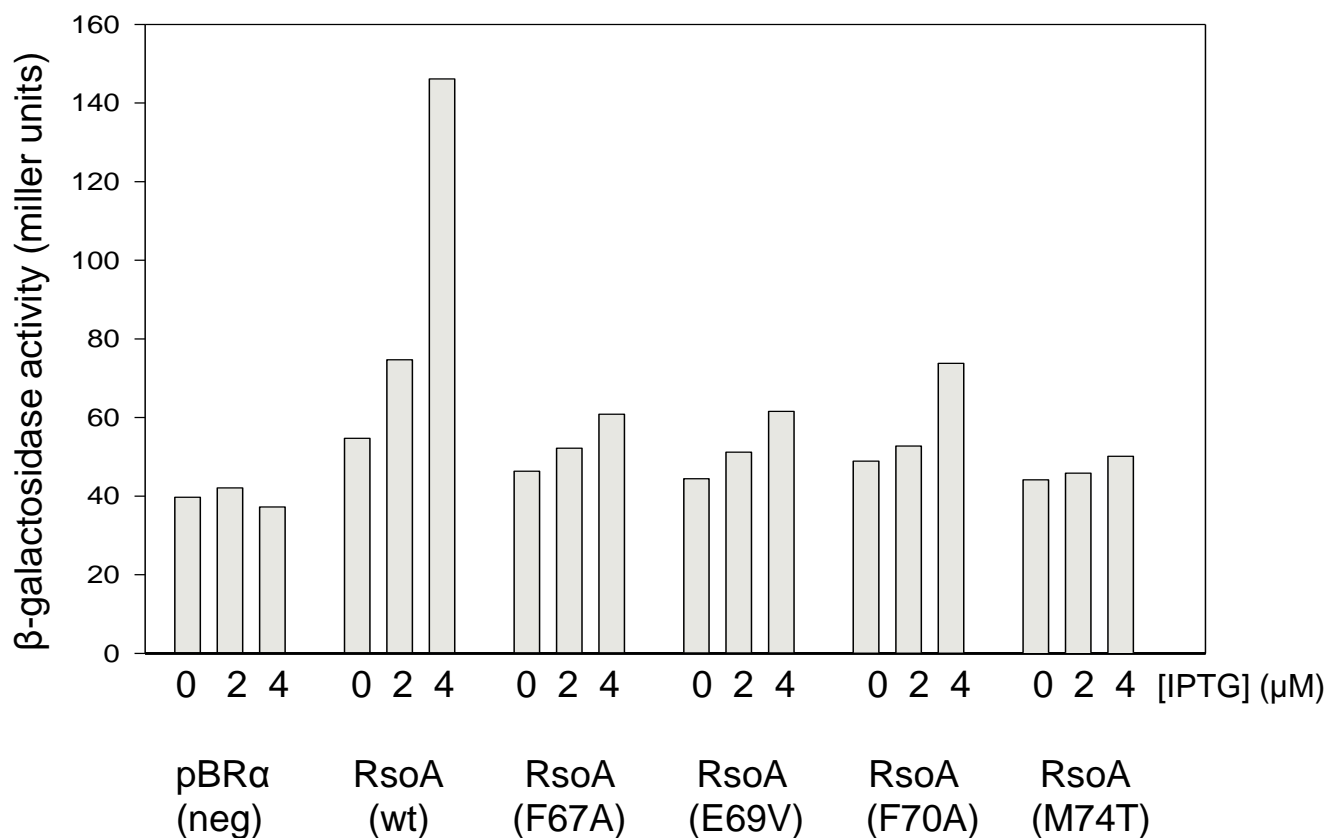

**Fig. S4.** Activity of key RsoA mutants interacting with  $\beta'$  subunit N-terminus (amino acids 1-303).  $\lambda$ Cl-RpoC ( $\beta'$  subunit) fusion and RpoA ( $\alpha$  subunit)-RsoA fusions were tested in host strain *E. coli* FW Kan  $O_{L2-62}$  lac. Details of assay methodology are as described in Dove and Hochschild (2004) and MacLellan et al., (2009).

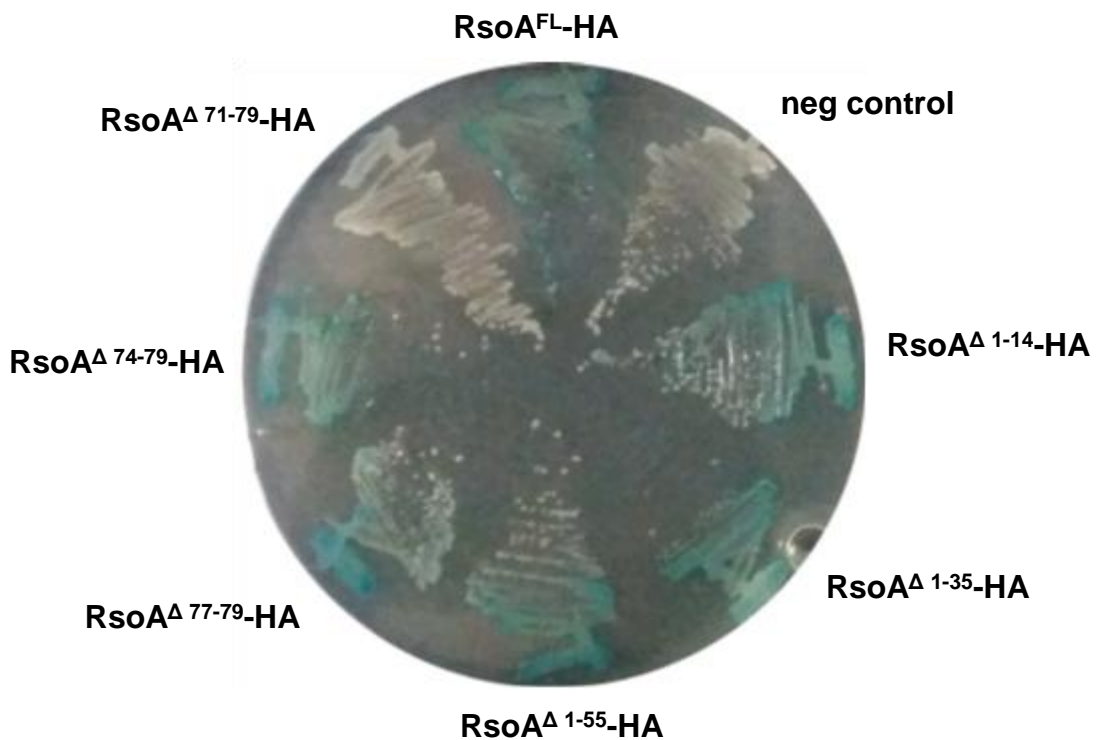

**Fig. S5.** Interaction of epitope-tagged RsoA derivatives with SigO-FLAG. Each strain expresses a CyaA<sup>T18</sup>-SigO<sup>Nterm</sup>-FLAG fusion protein in *E. coli* BTH101. RsoA derivatives expressed as CyaA<sup>T25</sup> fusions with C-terminal haemagglutinin (HA) epitope tags. RsoA derivatives tested include 79 amino acid full-length RsoA (FL) and three N-terminal deletions (deleted amino acids 1-14, 1-35, and 1-55) and three C-terminal deletions (deleted amino acids 77-79, 74-79, and 71-79). Negative control strain expresses a CyaA<sup>T18</sup>-SigO<sup>Nterm</sup>-FLAG fusion protein but carries non-recombinant plasmid pKT25.

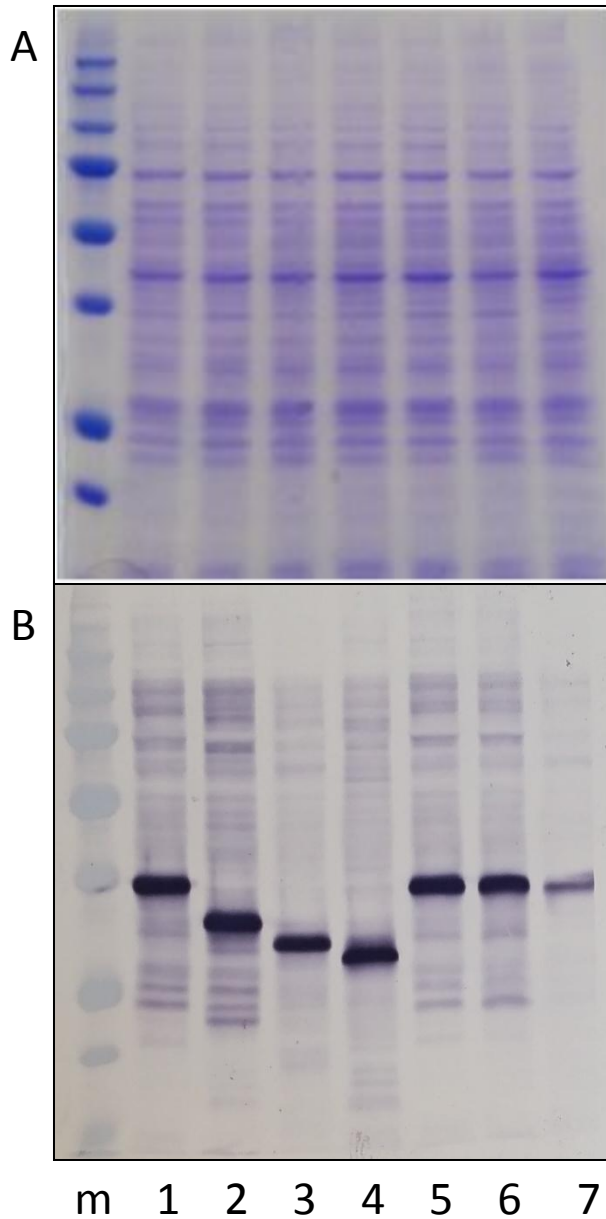

**Fig. S6.** Accumulation of CyaA<sup>T25</sup>-RsoA-HA fusion proteins in *E. coli*. A) Coomassie-stained gel (loading control). B) Immunoblot using anti-HA antibodies. Lanes: m, molecular weight marker; 1, full length RsoA (79 amino acids); 2,  $\Delta$  amino acids 1-14; 3,  $\Delta$  amino acids 1-35; 4,  $\Delta$  amino acids 1-55; 5,  $\Delta$  amino acids 77-79; 6,  $\Delta$  amino acids 74-79; 7,  $\Delta$  amino acids 71-79.

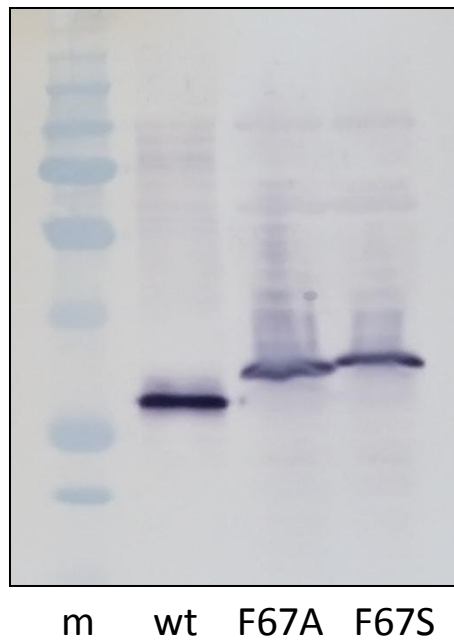

**Fig. S7.** Mutation of RsoA F67 results in aberrant mobility of CyaA-RsoA<sup>2.3</sup>-HA during SDS-PAGE. Immunoblot using anti-HA antibodies. Lanes: m, molecular weight marker; wt, CyaA-RsoA<sup>2.3</sup>-HA; and the F67A and F67S derivatives of CyaA-RsoA<sup>2.3</sup>-HA.



|                                      |                                                                                                  |
|--------------------------------------|--------------------------------------------------------------------------------------------------|
| B_subtilisRsoA                       | .....VDGQFEQ-KKKQKDETYDIEHLIACFSPMIRKKLSNTSYQEREDLEQELKIKMFEKADMLLCQDVPGFWEFILYMVDENS*           |
| B_subtilisPTS_394                    | .....VNGQFEQ-KKKQKDETYDIEHLIACFSPMIRKKLSNTSYQEREDLEQELKIKMFEKADMLLCQDVPGFWEFILYMVDENS*           |
| B_subtilissubtilisBAB-1              | .....VDGQFEQ-KKRQKDETYDIEHLIACFSPMIRKKLSNTSYQEREDLEQELKIKMFEKADMLLCQDVPGFWEFILYMVDENS*           |
| B_subtilissubtilisAUS198             | .....VDGQFEQ-KKKQKDETYDIEHLIACFSPMIRKKLSNTSYQEREDLEQELKIKMFEKADMLLCQDVPGFWEFILYMVDENS*           |
| B_valisismortisDV1-F-3               | .....VNGQFDQ-K-KQKDDMYDIEHLIACFSPMIRKKLSNTSYQEREDLEQELRIKMEKADMLLCQDVPGFWEFILYMVDENS*            |
| B_subtilisgp20b                      | .....VNGQFEQ-K-KQKDDMYDIEHLIACFSPMIRKKLSNTSYQEREDLEQELKIKMFEKADMLLCQDVPGFWEFILYMVDENS*           |
| B_subtilispizzizenuiATCC6633         | .....VNGQFEQ-K-NQKDDKFDIEHLIECFSPMIRKKLSNTSYQEREDLEQELKIKMFEKADMLLCQDVPGFWEFILYMVDENS*           |
| B_mnojavensisRO-H-1=KCTC3706         | .....VSGQFEH-N-RDHDEMYDIEHLIACFSPMIRKKLSNTSYQEREDLEQELKIKMFEKADMLLCQDVPGFWEFILYMVDENS*           |
| B_teculensisKCTC13622                | .....VNRQFEQ-K-KQRDDMYDIEHLIACFSPMIRKKLSNTSYQEREDLEQELKIKMFEKAHMLLCQDVPGFWEFILHMADENS*           |
| B_subtilispizzizenuiDV1-B-1          | .....VNGQFEQ-K-NQKDDTFDIEHLIECFSPMIRKKLSNTSYQEREDLEQELKIKMFEKADMLLCQDVPGFWEFILYMVDENS*           |
| B_subtilissubtilis6051-HGW           | .....VDGQFEQ-KKRQKDETYDIEHLIACFSPMIRKKLSNTSYQEREDLEQELKIKMFEKADMLLCQDVPGFWEFILYMVDENS*           |
| B_subtilisXF-1                       | .....VSRLEH-N-H-NNKTDABEIERLIAGFSPMIRKKLSNTSYQEREDLEQELKIKI FEKADMLLCQDVPGFWEFII EYMEEN*         |
| B_atrophaeusC89                      | .....VNGPFD F-N-KENTDTDEMELLSRFSPMIRKKLSNTSYQEREDLEQELKIKI FEKADMLLCQDVPGFWEFIIHL INESS*         |
| B_subtilisGB03                       | .....VNGPFD F-N-KENTDTDEMELLSRFSPMIRKKLSNTSYQEREDLEQELKIKI FEKADMLLCQDVPGFWEFIIHL INESS*         |
| B_anyloliquefaciensXH7               | .....VNGPFD F-N-KEKTDIDEMELLSRFSPMIRKKLSNTSYQEREDLEQELKIKI FEKADMLLCQDVPGFWEFIIHL INENS*         |
| B_anyloliquefaciensplantarumW2       | LQQRHRYRNGTDFD-A.....FFANDKKKLSNTSYQEREDLEQELKIKI FEKADMLLCQDVPGFWEFIIHL INESS*                  |
| B_anyloliquefaciensplantarumUCMB5113 | .....VNGPFD F-N-KENTDTDEMELLSRFSPMIRKKLSNTSYQEREDLEQELKIKI FEKADMLLCQDVPGFWEFIIHL INESS*         |
| B_subtilisSPZ1                       | .....VNGPFD F-N-KENTDTDEMELLSRFSPMIRKKLSNTSYQEREDLEQELKIKI FEKADMLLCQDVPGFWEFIIHL INESS*         |
| B_anyloliquefaciensUASWSBA1          | .....VNGPFD F-N-KENTDTDEMELLSRFSPMIRKKLSNTSYQEREDLEQELKIKI FEKADMLLCQDVPGFWEFIIHL INESS*         |
| B_methylophilusSK19 001              | LQQRHRYRNGTDFD-A.....FFANDKKKLSNTSYQEREDLEQELKIKI FEKADMLLCQDVPGFWEFIIHL INESS*                  |
| B_sorensisNBRC101234=KCTC13918       | .....VSLHDEKDIEKLEENFTPMIKSKLNNTSYQEREDLEQELKMKICEKAEMLLCQDVPGFWEFIIEL LKVL*                     |
| B_spBTIB_CT2                         | .....VSVHDEKEIEKLEENFTPMIKSKLNNTSYQEREDLEQELKMKICEKAEMLLCQDVPGFWEFIIEL LKVL*                     |
| B_licheniformisS16                   | .....VSLHDEKEIEKLEENFTPMIKSKLNNTSYQEREDLEQELKMKICEKAEMLLCQDVPGFWEFIIEL LKVL*                     |
| B_licheniformis5-2-D                 | .....VSLHDEKEIEKLEENFTPMIKSKLNNTSYQEREDLEQELKMKICEKAEMLLCQDVPGFWEFIIEL LKVL*                     |
| B_spNSP9 1                           | .....VSLHDEKDIEKLEENFTPMIKSKLNNTSYQEREDLEQELKMKICEKAEMLLCQDVPGFWEFIIEL LKVL*                     |
| B_spSB47                             | .....VSLHDEKEIEKLEENFTPMIKSKLNNTSYQEREDLEQELKMKICEKAEMLLCQDVPGFWEFIIEL LKVL*                     |
| B_altridius41KF2b                    | .....MEELIETFTPMIKKKLQNTAYQEREDLEQELYIKLIEKVDWL IYQEGPGFWEFIVEYMTKL*                             |
| B_pumilusINR7                        | .....VNEDKMTNGEMEELIETFTPMIKKKLQNTAYQEREDLEQELYIKLIEKIDRL IYQEGPGFWEFIVEYMTKM*                   |
| B_pumilusCCMA-560NODE_3              | .....MS-VHEDKMTNGEMEELIETFTPMIKKKLQNTAYQEREDLEQELYIKLIEKIDRL IYQEGPGFWEFIVEYMTKL*                |
| B_spCPSM8                            | .....M-I TVSLHDEKEIEKLEENFTPMIKSKLNNTSYQEREDLEQELKMKICEKAEMLLCQDVPGFWEFIIEL LKVL*                |
| B_pumilusE-1                         | .....VNEEKMTPNGEMEELIETFTPMIKKKLQNTAYQEREDLEQELYIKLIEKVDWL IYQEGPGFWEFIVEYMTKM*                  |
| B_safensisCF A06                     | .....VHEDKMTNGEMEELIETFTPMIKKKLQNTAYQEREDLEQELYIKLIEKIDRL IYQEGPGFWEFIVEYMTKM*                   |
| B_stratosphericusLAMA585             | .....VQEDKI TNNGEMEELIETFTPMIKKKLQNTAYQEREDLEQELYIKLIEKVDWL IYQEGPGFWEFIVEYMTKL*                 |
| B_spHYC-10                           | .....VKEDKI TNNGEMEELIETFTPMIKKKLQNTAYQEREDLEQELYIKLIEKVDWL IYQEGPGFWEFIVDYL IJL*                |
| B_spDW-5-4                           | .....VNEEKMTPNGEMEELIETFTPMIKKKLQNTAYQEREDLEQELYIKLIEKVDWL IYQEGPGFWEFIVEYMTKL*                  |
| B_pumilusATCC7061                    | .....VNEEKMTPNGEMEELIETFTPMIKKKLQNTAYQEREDLEQELYIKLIEKVDWL IYQEGPGFWEFIVEYMTKL*                  |
| B_pumilusBA06                        | .....VNEEKMTPNGEMEELIETFTPMIKKKLQNTAYQEREDLEQELYIKLIEKVDWL IYQEGPGFWEFIVEYMTKL*                  |
| B_pumilusSAFR-032                    | .....VNEEKMTPNGEMEELIETFTPMIKKKLQNTAYQEREDLEQELYIKLIEKVDWL IYQEGPGFWEFIVEYMTKM*                  |
| B_pumilus7P                          | .....VNEDKI TNNGEMEELIETFTPMIKKKLQNTAYQEREDLEQELYIKLIEKVDWL IYQEGPGFWEFIVEYMTKL*                 |
| B_thuringiensiskonkukan              | .....MMAM-PNFKFSDNNF EVILNLPK I KSKLNTPQERADLEQELK IYK IYKIDV FDNF SAGF FDFIEGVN I K I STF*      |
| P_larvaelarvaeDSM25719               | .....METFI TLVKEAKQNNRHAMQI INRFKPK I DSS QYEREDLEQELK IYK IYKIDV YDLN S TPGFWEF YVESQVSKV NKEK* |
| B_thuringiensisLM1212                | .....MIK-LNDQHLN S CNYEEILR IFKFK I C S CLQNTPYQEREDLEQELK IYK IYKIDV INGLEVPGF EFLDGS TNS*      |
| B_cereusVD131                        | .....MIE-LNNQNLN S CNYEEILR IFKFK I C S CLQNTPYQEREDLEQELK IYK IYKIDV INGLEVPGF EFLDGS TNS*      |
| B_cereusBcFL2013                     | .....MRK-LNDQHLN S CNYEEILR IFKFK I C S CLQNTPYQEREDLEQELK IYK IYKIDV INGLEVPGF EFLDGS TNS*      |

**Fig. S8.** Multiple sequence alignment of *B. subtilis* RsoA (top line) and 44 predicted orthologous amino acid sequences. Asterisks indicate 100% conservation. Regions of similarity to  $\sigma^{70}$  regions 2.2 and 2.3 indicated and delineated as for Fig. 1 alignment. Positions of RsoA residues F67 and F70 as indicated.

## References cited in Supplemental Information

MacLellan, S. R., Wecke, T. & Helmann, J. D. (2008). A previously unidentified sigma factor and two accessory proteins regulate oxalate decarboxylase expression in *Bacillus subtilis*. *Mol Microbiol* 69, 954–967.

Dove, S. L. & Hochschild, A. (2004). A bacterial two-hybrid system based on transcription activation. *Methods Mol Biol* 261, 231–46.

MacLellan, S. R., Guariglia-Oropeza, V., Gaballa, A. & Helmann, J. D. (2009). A two-subunit bacterial sigma-factor activates transcription in *Bacillus subtilis*. *Proc Natl Acad Sci U S A* 106, 21323–21328.

Table S1. Bacterial strains used in this study.

| Strains                         | Parental Strains/characteristics                                                                                                                                                                      | Source    |
|---------------------------------|-------------------------------------------------------------------------------------------------------------------------------------------------------------------------------------------------------|-----------|
| <i>E. coli strains</i>          |                                                                                                                                                                                                       |           |
| <i>E. coli</i> DH5 $\alpha$     | F <sup>-</sup> endA1 glnV44 thi-1 recA1 relA1 gyrA96 deoR nupG $\Phi$ 80d/lacZ $\Delta$ M15 $\Delta$ (lacZYA-argF)U169, hsdR17(r <sub>K</sub> <sup>-</sup> m <sub>K</sub> <sup>+</sup> ), $\lambda$ - | Novagen   |
| <i>E. coli</i> BL21 (DE3) pLysS | F <sup>-</sup> ompT gal dcm lon hsdS <sub>B</sub> (r <sub>B</sub> <sup>-</sup> m <sub>B</sub> <sup>-</sup> ) $\lambda$ (DE3) pLysS(cm <sup>R</sup> )                                                  | Novagen   |
| <i>E. coli</i> BL21 (DE3) pLysE | F <sup>-</sup> ompT gal dcm lon hsdS <sub>B</sub> (r <sub>B</sub> <sup>-</sup> m <sub>B</sub> <sup>-</sup> ) $\lambda$ (DE3) pLysE(cm <sup>R</sup> )                                                  | Novagen   |
| <i>E. coli</i> BTH101           | F <sup>-</sup> cya-99 araD139 galE15 galK16 rpsL1 (Str <sup>R</sup> ) hsdR2 mcrA1 mcrB1                                                                                                               | Euromedex |
| NB357                           | BTH101 (pXM10 x pXM12)                                                                                                                                                                                | this work |
| NB358                           | BTH101 (pXM10 x pSAD1)                                                                                                                                                                                | this work |
| NB359                           | BTH101 (pXM10 x pSAD2)                                                                                                                                                                                | this work |
| NB360                           | BTH101 (pXM10 x pSAD3)                                                                                                                                                                                | this work |
| NB361                           | BTH101 (pXM10 x pSAD4)                                                                                                                                                                                | this work |
| NB362                           | BTH101 (pXM10 x pSAD5)                                                                                                                                                                                | this work |
| NB363                           | BTH101 (pXM10 x pSAD6)                                                                                                                                                                                | this work |
| NB364                           | BTH101 (pXM10 x pSAD7)                                                                                                                                                                                | this work |
| NB624                           | BTH101 (pUT18C x pKT25)                                                                                                                                                                               | this work |
| NBXOO1                          | BTH101 (pXM10 x pXM41)                                                                                                                                                                                | this work |
| NBXOO2                          | BTH101 (pXM10 x pXM14)                                                                                                                                                                                | this work |
| NBXOO3                          | BTH101 (pXM10 x pXM15)                                                                                                                                                                                | this work |
| NBXOO4                          | BTH101 (pXM10 x pXM16)                                                                                                                                                                                | this work |
| NBXOO5                          | BTH101 (pXM10 x pXM17)                                                                                                                                                                                | this work |
| NBXOO6                          | BTH101 (pXM10 x pXM18)                                                                                                                                                                                | this work |
| NBXOO7                          | BTH101 (pXM10 x pXM19)                                                                                                                                                                                | this work |
| NBXOO8                          | BTH101 (pXM10 x pXM20)                                                                                                                                                                                | this work |
| NBXOO9                          | BTH101 (pXM10 x pXM21)                                                                                                                                                                                | this work |
| NBXO10                          | BTH101 (pXM10 x pXM22)                                                                                                                                                                                | this work |
| NBXO11                          | BTH101 (pXM10 x pXM23)                                                                                                                                                                                | this work |
| NBXO12                          | BTH101 (pXM10 x pXM24)                                                                                                                                                                                | this work |
| NBXO13                          | BTH101 (pXM10 x pXM55)                                                                                                                                                                                | this work |
| NBXO14                          | BTH101 (pXM10 x pXM25)                                                                                                                                                                                | this work |
| NBXO15                          | BTH101 (pXM10 x pXM56)                                                                                                                                                                                | this work |
| NBXO16                          | BTH101 (pXM10 x pXM26)                                                                                                                                                                                | this work |
| NBXO17                          | BTH101 (pXM10 x pXM57)                                                                                                                                                                                | this work |
| NBXO18                          | BTH101 (pXM10 x pXM58)                                                                                                                                                                                | this work |
| NBXO19                          | BTH101 (pXM10 x pXM59)                                                                                                                                                                                | this work |
| NBXO20                          | BTH101 (pXM10 x pXM13)                                                                                                                                                                                | this work |
| NBXO21                          | BTH101 (pXM10 x pXM28)                                                                                                                                                                                | this work |
| NBXO22                          | BTH101 (pXM10 x pXM29)                                                                                                                                                                                | this work |
| NBXO23                          | BTH101 (pXM10 x pXM30)                                                                                                                                                                                | this work |
| NBXO24                          | BTH101 (pXM10 x pXM31)                                                                                                                                                                                | this work |
| NBXO25                          | BTH101 (pXM10 x pXM32)                                                                                                                                                                                | this work |
| NBXO26                          | BTH101 (pXM10 x pXM33)                                                                                                                                                                                | this work |
| NBXO27                          | BTH101 (pXM10 x pXM34)                                                                                                                                                                                | this work |

|                            |                                                                                                       |                |
|----------------------------|-------------------------------------------------------------------------------------------------------|----------------|
| NBXO28                     | BTH101 (pXM10 x pXM35)                                                                                | this work      |
| NBXO29                     | BTH101 (pXM10 x pXM36)                                                                                | this work      |
| NBXO30                     | BTH101 (pXM10 x pXM60)                                                                                | this work      |
| NBXO31                     | BTH101 (pXM10 x pXM61)                                                                                | this work      |
| NBXO32                     | BTH101 (pXM10 x pXM62)                                                                                | this work      |
| NBXO32                     | BTH101 (pXM10 x pAB1)                                                                                 | this work      |
| NBXO32                     | BTH101 (pXM10 x pAB2)                                                                                 | this work      |
| NBXO32                     | BTH101 (pXM10 x pAB3)                                                                                 | this work      |
| NBXO32                     | BTH101 (pXM10 x pAB4)                                                                                 | this work      |
| NB1116                     | BTH101 (pXM10 x pSRM15)                                                                               | this work      |
| NB1117                     | BTH101 (pXM10 x pSRM16)                                                                               | this work      |
| NB1118                     | BTH101 (pXM10 x pSRM17)                                                                               | this work      |
| NB1119                     | BTH101 (pXM10 x pSRM18)                                                                               | this work      |
| NB1120                     | BTH101 (pXM10 x pSRM19)                                                                               | this work      |
| NB1121                     | BTH101 (pXM10 x pSRM20)                                                                               | this work      |
| NB1122                     | BTH101 (pXM10 x pSRM22)                                                                               | this work      |
| <i>B. subtilis</i> strains |                                                                                                       |                |
| CU1065                     | W168 trpC2 attSP $\beta$                                                                              | lab collection |
| HB7734                     | (CU1065) $\Delta sigO-rsoA$ (pSM002) P <sub>xyIA</sub> -sigO, (pSM004) P <sub>oxdC</sub> -lacZ fusion | 1              |
| NB485                      | (HB7734) pSM019, ectopic expression of wt RsoA                                                        | this work      |
| NB486                      | (HB7734) pXM1, ectopic expression of RsoA (L59A)                                                      | this work      |
| NB487                      | (HB7734) pXM2, ectopic expression of RsoA (Q62A)                                                      | this work      |
| NB488                      | (HB7734) pSM194, ectopic expression of RsoA (P65A)                                                    | this work      |
| NB489                      | (HB7734) pSM195, ectopic expression of RsoA (G66A)                                                    | this work      |
| NB490                      | (HB7734) pSM048, ectopic expression of RsoA (F67A)                                                    | this work      |
| NB491                      | (HB7734) pSM049, ectopic expression of RsoA (W68A)                                                    | this work      |
| NB492                      | (HB7734) pSAD46, ectopic expression of RsoA (E69A)                                                    | this work      |
| NB493                      | (HB7734) pSM051, ectopic expression of RsoA (F70A)                                                    | this work      |
| NB494                      | (HB7734) pSAD43, ectopic expression of RsoA (I71N)                                                    | this work      |
| NB495                      | (HB7734) pXM3, ectopic expression of RsoA (L72A)                                                      | this work      |
| NB496                      | (HB7734) pXM37, ectopic expression of RsoA (M74A)                                                     | this work      |
| NB497                      | (HB7734) pXM38, ectopic expression of RsoA (V75A)                                                     | this work      |
| NB498                      | (HB7734) pXM39, ectopic expression of RsoA (D76A)                                                     | this work      |
| NB540                      | (HB7734) pSM016, neg control                                                                          | this work      |
| NB544                      | (HB7734) pSAD50, ectopic expression of RsoA (E69V)                                                    | this work      |
| NB545                      | (HB7734) pSAD47, ectopic expression of RsoA (M74T)                                                    | this work      |
| NB546                      | (HB7734) pSAD48, ectopic expression of RsoA (I71N)                                                    | this work      |
| NB552                      | (HB7734) pSAD49, ectopic expression of RsoA (F67S)                                                    | this work      |

Table S2. Plasmids used in this study.

| Plasmids         | Parental/characteristics                                    | Source    |
|------------------|-------------------------------------------------------------|-----------|
| pET-DUET         | dual MCS, IPTG inducible                                    | Novagen   |
| pUT18C           | BACTH <i>cyoA</i> (T18), Kn <sup>R</sup>                    | Euromedex |
| pKT25            | BACTH <i>cyoA</i> (T25), Kn <sup>R</sup>                    | Euromedex |
| pAX01            | xylose inducible expression vector, <i>lacA</i> integration | 2         |
| pSWEET           | xylose inducible expression vector, <i>amyE</i> integration | 3         |
| pDG1663          | <i>lacZ</i> reporter, <i>thrC</i> integration               | 4         |
| pSM002           | (pSWEET) <i>sigO</i>                                        | 5         |
| pSM004           | (pDG1663) <i>PoxdC-lacZ</i> fusion                          | 5         |
| pSM016           | Kn <sup>r</sup> derivative of pAX01                         | 5         |
| pSM019           | (pSM016) <i>rsoA</i>                                        | 5         |
| pSM048           | (pSM019) <i>rsoA</i> <sup>FL</sup> (F67A)                   | 5         |
| pSM049           | (pSM019) <i>rsoA</i> <sup>FL</sup> (W68A)                   | 5         |
| pSM051           | (pSM019) <i>rsoA</i> <sup>FL</sup> (F70A)                   | 5         |
| pSM194           | (pSM019) <i>rsoA</i> <sup>FL</sup> (P65A)                   | 5         |
| pSM195           | (pSM019) <i>rsoA</i> <sup>FL</sup> (G66A)                   | 5         |
| pBR $\alpha$     | BACTH $\alpha$ subunit fusion                               | 6         |
| pAC $\lambda$ cl | BACTH $\lambda$ cl fusion                                   | 6         |
| pSAD1            | (pKT25) <i>rsoA</i> $\Delta$ codons 77-79                   | this work |
| pSAD2            | (pKT25) <i>rsoA</i> $\Delta$ codons 74-79                   | this work |
| pSAD3            | (pKT25) <i>rsoA</i> $\Delta$ codons 71-79                   | this work |
| pSAD4            | (pKT25) <i>rsoA</i> $\Delta$ codons 68-79                   | this work |
| pSAD5            | (pKT25) <i>rsoA</i> $\Delta$ codons 1-14                    | this work |
| pSAD6            | (pKT25) <i>rsoA</i> $\Delta$ codons 1-34                    | this work |
| pSAD7            | (pKT25) <i>rsoA</i> $\Delta$ codons 1-56                    | this work |
| pSAD46           | (pSM019) <i>rsoA</i> <sup>FL</sup> (E69A)                   | this work |
| pSAD47           | (pSM019) <i>rsoA</i> <sup>FL</sup> (M74T)                   | this work |
| pSAD48           | (pSM019) <i>rsoA</i> <sup>FL</sup> (I71N)                   | this work |
| pSAD49           | (pSM019) <i>rsoA</i> <sup>FL</sup> (F67S)                   | this work |
| pSAD50           | (pSM019) <i>rsoA</i> <sup>FL</sup> (E69V)                   | this work |
| pSAD51           | (pSM019) <i>rsoA</i> <sup>FL</sup> (F70A)                   | this work |
| pXM1             | (pSM019) <i>rsoA</i> <sup>FL</sup> (L59A)                   | this work |
| pXM2             | (pSM019) <i>rsoA</i> <sup>FL</sup> (Q62A)                   | this work |
| pXM3             | (pSM019) <i>rsoA</i> <sup>FL</sup> (L72A)                   | this work |
| pXM10            | (pUT18C) <i>sigO</i>                                        | this work |
| pXM12            | (pKT25) <i>rsoA</i> <sup>FL</sup>                           | this work |
| pXM13            | (pKT25) <i>rsoA</i> <sup>2,3</sup>                          | this work |
| pXM14            | (pKT25) <i>rsoA</i> <sup>FL</sup> (R41A)                    | this work |
| pXM15            | (pKT25) <i>rsoA</i> <sup>FL</sup> (E42A)                    | this work |
| pXM16            | (pKT25) <i>rsoA</i> <sup>FL</sup> (D33A)                    | this work |
| pXM17            | (pKT25) <i>rsoA</i> <sup>FL</sup> (L44A)                    | this work |
| pXM18            | (pKT25) <i>rsoA</i> <sup>FL</sup> (E47A)                    | this work |
| pXM19            | (pKT25) <i>rsoA</i> <sup>FL</sup> (L59A)                    | this work |

|        |                                                                       |           |
|--------|-----------------------------------------------------------------------|-----------|
| pXM20  | (pKT25) <i>rsoA</i> <sup>FL</sup> (Q62A)                              | this work |
| PXM21  | (pKT25) <i>rsoA</i> <sup>FL</sup> (P65A)                              | this work |
| pXM22  | (pKT25) <i>rsoA</i> <sup>FL</sup> (G66A)                              | this work |
| pXM23  | (pKT25) <i>rsoA</i> <sup>FL</sup> (F67A)                              | this work |
| pXM24  | (pKT25) <i>rsoA</i> <sup>FL</sup> (W68A)                              | this work |
| pXM25  | (pKT25) <i>rsoA</i> <sup>FL</sup> (F70A)                              | this work |
| pXM26  | (pKT25) <i>rsoA</i> <sup>FL</sup> (L72A)                              | this work |
| pXM27  | (pKT25) <i>rsoA</i> <sup>2,3</sup> (L59A)                             | this work |
| pXM28  | (pKT25) <i>rsoA</i> <sup>2,3</sup> (Q62A)                             | this work |
| pXM29  | (pKT25) <i>rsoA</i> <sup>2,3</sup> (P65A)                             | this work |
| pXM30  | (pKT25) <i>rsoA</i> <sup>2,3</sup> (G66A)                             | this work |
| pXM31  | (pKT25) <i>rsoA</i> <sup>2,3</sup> (F67A)                             | this work |
| pXM32  | (pKT25) <i>rsoA</i> <sup>2,3</sup> (W68A)                             | this work |
| pXM33  | (pKT25) <i>rsoA</i> <sup>2,3</sup> (E69A)                             | this work |
| pXM34  | (pKT25) <i>rsoA</i> <sup>2,3</sup> (F70A)                             | this work |
| pXM35  | (pKT25) <i>rsoA</i> <sup>2,3</sup> (I71A)                             | this work |
| pXM36  | (pKT25) <i>rsoA</i> <sup>2,3</sup> (L72A)                             | this work |
| pXM37  | (pSM019) <i>rsoA</i> <sup>FL</sup> (M74A)                             | this work |
| pXM38  | (pSM019) <i>rsoA</i> <sup>FL</sup> (V75A)                             | this work |
| pXM39  | (pSM019) <i>rsoA</i> <sup>FL</sup> (D76A)                             | this work |
| pXM40  | (pUT18C) <i>sigO</i> -FLAG                                            | this work |
| pXM41  | (pKT25) <i>rsoA</i> <sup>FL</sup> -HA                                 | this work |
| pXM46  | (pKT25) <i>rsoA</i> <sup>FL</sup> -HA (F67A)                          | this work |
| pTS19  | (pKT25) <i>rsoA</i> <sup>FL</sup> -HA (F67S)                          | this work |
| pTS20  | (pKT25) <i>rsoA</i> <sup>FL</sup> -HA (E69V)                          | this work |
| pXM55  | (pKT25) <i>rsoA</i> <sup>FL</sup> (E69A)                              | this work |
| pXM56  | (pKT25) <i>rsoA</i> <sup>FL</sup> (I71A)                              | this work |
| pXM57  | (pKT25) <i>rsoA</i> <sup>FL</sup> (M74A)                              | this work |
| pXM58  | (pKT25) <i>rsoA</i> <sup>FL</sup> (V75A)                              | this work |
| pXM59  | (pKT25) <i>rsoA</i> <sup>FL</sup> (D76A)                              | this work |
| PXM60  | (pKT25) <i>rsoA</i> <sup>2,3</sup> (M74A)                             | this work |
| pXM61  | (pKT25) <i>rsoA</i> <sup>2,3</sup> (V75A)                             | this work |
| pXM62  | (pKT25) <i>rsoA</i> <sup>2,3</sup> (D76A)                             | this work |
| pSRM15 | (pKT25) <i>rsoA</i> polyGLY-Ala <sup>56</sup> -Asp <sup>76</sup> (wt) | this work |
| pSRM16 | (pKT25) <i>rsoA</i> polyGLY-Leu <sup>59</sup> -Asp <sup>76</sup> (wt) | this work |
| pSRM17 | (pKT25) <i>rsoA</i> polyGLY-Gln <sup>62</sup> -Asp <sup>76</sup> (wt) | this work |
| pSRM18 | (pKT25) <i>rsoA</i> polyGLY-Pro <sup>65</sup> -Asp <sup>76</sup> (wt) | this work |
| pSRM19 | (pKT25) <i>rsoA</i> polyGLY-Phe <sup>67</sup> -Asp <sup>76</sup> (wt) | this work |
| pSRM20 | (pKT25) <i>rsoA</i> polyGLY-Trp <sup>68</sup> -Asp <sup>76</sup> (wt) | this work |
| pSRM22 | (pKT25) <i>rsoA</i> polyGLY-A <sup>56</sup> -Asp <sup>76</sup> (F67A) | this work |
| pSRM23 | (pUT18C) <i>sigO</i> <sup>Nterm</sup> -FLAG                           | this work |
| pSRM24 | (pKT25) <i>rsoA</i> <sup>FL</sup> (wt)-HA                             | this work |
| pSRM25 | (pKT25) <i>rsoA</i> <sup>FL</sup> (F67A)-HA                           | this work |
| pSRM26 | (pKT25) <i>rsoA</i> <sup>FL</sup> (E69V)-HA                           | this work |
| pSRM27 | (pKT25) <i>rsoA</i> <sup>FL</sup> (F70A)-HA                           | this work |
| pSRM28 | (pKT25) <i>rsoA</i> <sup>FL</sup> (M74T)-HA                           | this work |

|        |                                                          |           |
|--------|----------------------------------------------------------|-----------|
| pLEC2  | (pKT25) <i>rsoA</i> -HA ( $\Delta$ codons 1-14)          | this work |
| pLEC2  | (pKT25) <i>rsoA</i> -HA ( $\Delta$ codons 1-34)          | this work |
| pLEC2  | (pKT25) <i>rsoA</i> -HA ( $\Delta$ codons 1-56)          | this work |
| pEF2   | (pKT25) <i>rsoA</i> -HA ( $\Delta$ codons 77-79)         | this work |
| pEF3   | (pKT25) <i>rsoA</i> -HA ( $\Delta$ codons 74-79)         | this work |
| pEF4   | (pKT25) <i>rsoA</i> -HA ( $\Delta$ codons 71-79)         | this work |
| pSRM29 | (pBR $\alpha$ )- <i>rsoA</i> (wt)                        | this work |
| pSRM30 | (pBR $\alpha$ )- <i>rsoA</i> (F67A)                      | this work |
| pSRM31 | (pBR $\alpha$ )- <i>rsoA</i> (E69V)                      | this work |
| pSRM32 | (pBR $\alpha$ )- <i>rsoA</i> (F70A)                      | this work |
| pSRM33 | (pBR $\alpha$ )- <i>rsoA</i> (M74T)                      | this work |
| pSRM34 | (pAC $\lambda$ cl)- <i>rpoC</i> (codons 1–303)           | this work |
| pSM186 | (pBR $\alpha$ ) <i>rsoA</i> -HA ( $\Delta$ codons 1-14)  | this work |
| pSM187 | (pBR $\alpha$ ) <i>rsoA</i> -HA ( $\Delta$ codons 1-34)  | this work |
| pSM188 | (pBR $\alpha$ ) <i>rsoA</i> -HA ( $\Delta$ codons 1-56)  | this work |
| pSM189 | (pBR $\alpha$ ) <i>rsoA</i> -HA ( $\Delta$ codons 77-79) | this work |
| pSM189 | (pBR $\alpha$ ) <i>rsoA</i> -HA ( $\Delta$ codons 74-79) | this work |
| pSM189 | (pBR $\alpha$ ) <i>rsoA</i> -HA ( $\Delta$ codons 71-79) | this work |

## References

1. MacLellan SR, Wecke T, Helmann JD (2008) A previously unidentified sigma factor and two accessory proteins regulate oxalate decarboxylase expression in *Bacillus subtilis*. *Mol Microbiol* 69:954–967.
2. Hartl B, Wehrl W, Wiegert T, Homuth G, Schumann W (2001) Development of a new integration site within the *Bacillus subtilis* chromosome and construction of compatible expression cassettes. *J Bacteriol* 183:2696–2699.
3. Bhavsar AP, Zhao X, Brown ED. (2001) Development and characterization of a xylose-dependent system for expression of cloned genes in *Bacillus subtilis*: Conditional complementation of a teichoic acid mutant. *Appl Environ Microbiol* 67:403–410.
4. Guerout-Fleury AM, Frandsen N, Stragier P (1996) Plasmids for ectopic integration in *Bacillus subtilis*. *Gene* 180:57–61.
5. MacLellan SR, Guariglia-Oropeza V, Gaballa A, Helmann JD (2009) A two-subunit bacterial sigma-factor activates transcription in *Bacillus subtilis*. *Proc Natl Acad Sci U S A*. 106:21323-8.
6. Dove SL, Hochschild A. (2004). A bacterial two-hybrid system based on transcription activation. *Methods Mol Biol* 261:231–46.
